# Supplementary figures and images for: A Novel Sub-Lineage of Chikungunya Virus East/Central/South African Genotype Indian Ocean Lineage Caused Sequential Outbreaks in Bangladesh and Thailand
Source: MDPI journal article supplement (doi:10.3390/v12111319), 2020-11-17

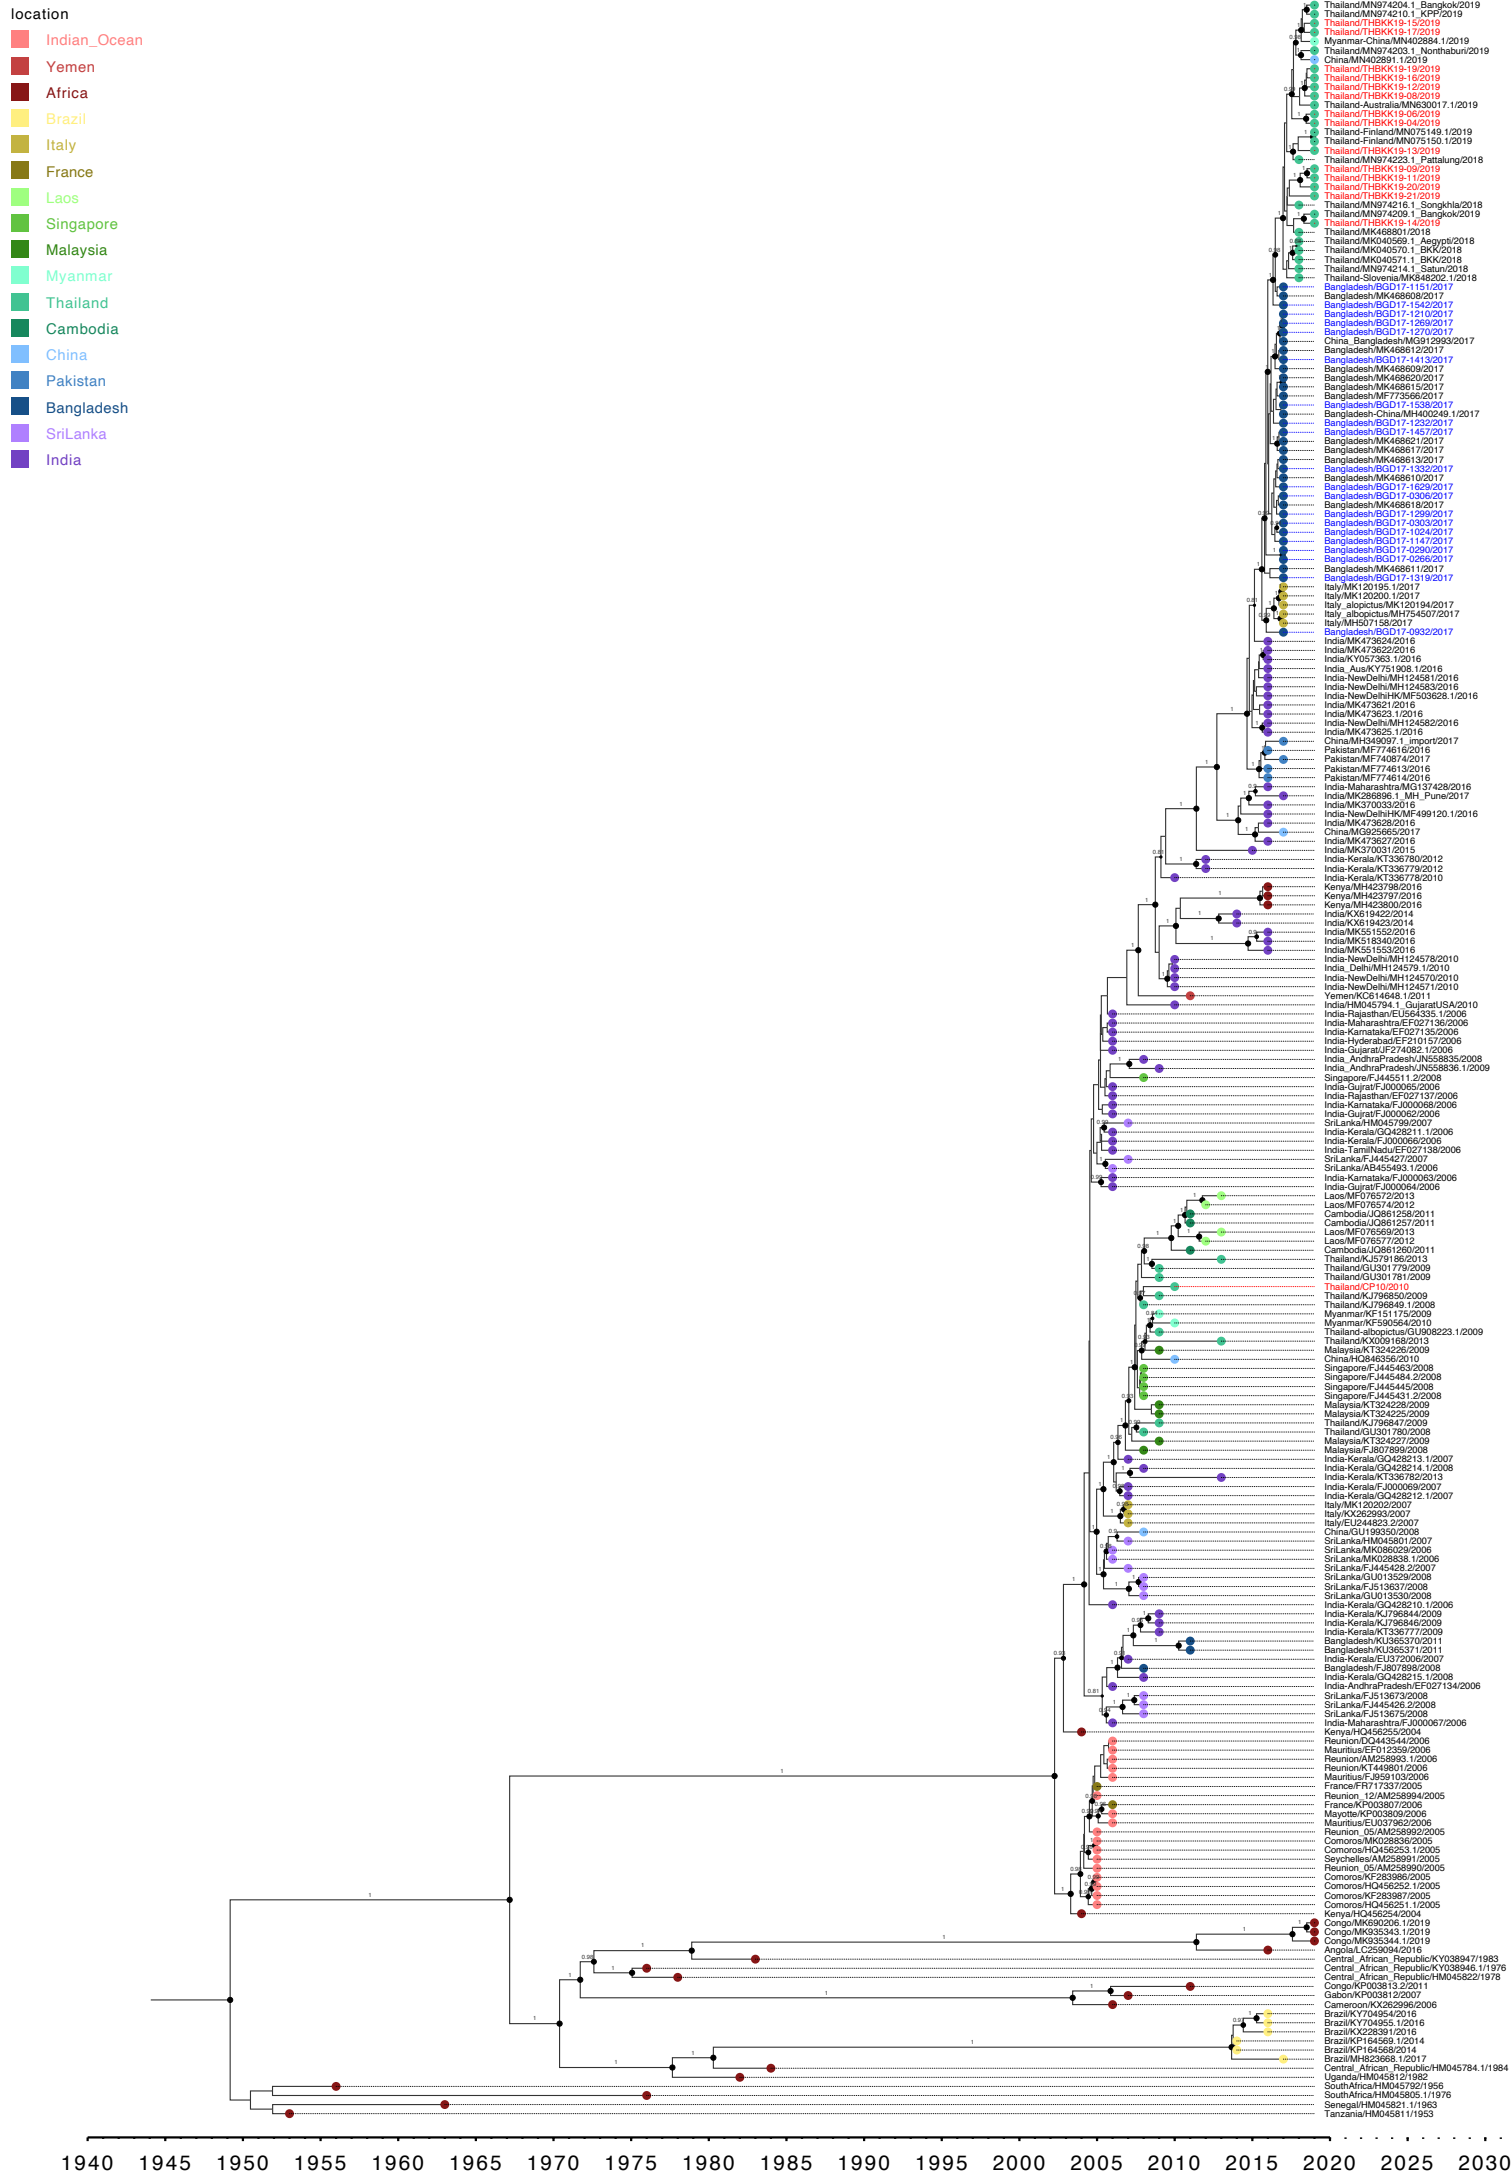

Supplement: s1 [file s1]
